| Official Symbol | NCBI ID           | Official full name                                       | % unseq | Length | Reference                                          |
|-----------------|-------------------|----------------------------------------------------------|---------|--------|----------------------------------------------------|
| 1 MT-CO2        | No BL NP_536846.1 | mitochondrially encoded cytochrome c oxidase II          | 0       | 0      | Kaltenbach et al., 2007, Plos Genet., 3:e82.       |
| 2 MT-CO3        | No BL NP_536849.1 | mitochondrially encoded cytochrome c oxidase III         | 0       | 0      | Kaltenbach et al., 2007, Plos Genet., 3:e82.       |
| 3 COX5B         | 4 NP_001853.2     | cytochrome c oxidase subunit Vb                          | 0       | 0      | Kaltenbach et al., 2007, Plos Genet., 3:e82.       |
| 4 COX6C         | 1 NP_004365.1     | cytochrome c oxidase subunit VIc                         | 0       | 0      | Kaltenbach et al., 2007, Plos Genet., 3:e82.       |
| 5 COX5A         | 1 NP_004246.1     | cytochrome c oxidase subunit Va                          | 18      | 14     | Kaltenbach et al., 2007, Plos Genet., 3:e82.       |
| 6 DLD           | 1 NP_000099.2     | dihydrolipoamide dehydrogenase                           | 0       | 0      | Kaltenbach et al., 2007, Plos Genet., 3:e82.       |
| 7 LDHA          | 4 NP_005557.1     | lactate dehydrogenase A                                  | 0       | 0      | Kaltenbach et al., 2007, Plos Genet., 3:e82.       |
| 8 LDHB          | 2 NP_002291.1     | lactate dehydrogenase B                                  | 1.49    | 5      | Kaltenbach et al., 2007, Plos Genet., 3:e82.       |
| 9 CCT6A         | 1 NP_001009186.1  | chaperonin containing TCP1, subunit 6A                   | 0       | 0      | Kaltenbach et al., 2007, Plos Genet., 3:e82.       |
| 10 UQCRC2       | 5 NP_003357.2     | ubiquinol-cytochrome c reductase core protein II         | 0       | 0      | Kaltenbach et al., 2007, Plos Genet., 3:e82.       |
| 11 PKM2         | 4 NP_002645.3     | pyruvate kinase, muscle                                  | 1.3     | 7      | Kaltenbach et al., 2007, Plos Genet., 3:e82.       |
| 12 ENO1         | 3 NP_001419.1     | enolase 1                                                | 4.37    | 19     | Kaltenbach et al., 2007, Plos Genet., 3:e82.       |
| 13 TPP1         | 0 NP_000382.3     | tripeptidyl peptidase I                                  | 7.1     | 15     | Kaltenbach et al., 2007, Plos Genet., 3:e82.       |
| 14 CD59         | 16 NP_000602.1    | CD59                                                     | 9.3     | 12     | Kaltenbach et al., 2007, Plos Genet., 3:e82.       |
| 15 ENO3         | 0 NP_001967.1     | enolase 3                                                | 10.4    | 27     | Kaltenbach et al., 2007, Plos Genet., 3:e82.       |
| 16 VDAC1        | 35 NP_003365.1    | voltage-dependent anion channel 1                        | 17.7    | 27     | Kaltenbach et al., 2007, Plos Genet., 3:e82.       |
| 17 GAPDH        | 26 NP_002037.2    | glyceraldehyde-3-phosphate dehydrogenase                 | 0       | 0      | Burke et al., 1996, Nat Med. 2:347-50              |
| 18 PFN2         | 18 NP_002619.1    | profilin 2                                               | 0       | 0      | <a href="http://hdbase.org">http://hdbase.org</a>  |
| 19 CTBP1        | 82 NP_001012632.1 | C-terminal binding protein 1                             | 1.59    | 7      | Kegel et al., 2002, J Biol Chem. 277:7466-76.      |
| 20 ECH1         | 0 NP_001389.2     | enoyl Coenzyme A hydratase 1, peroxisomal                | 6.09    | 15     | <a href="http://hdbase.org">http://hdbase.org</a>  |
| 21 HYPE         | 1 NP_009007.2     | Huntingtin interacting protein E                         | 6.76    | 26     | Faber et al., 1998, Hum Mol Genet. 7:1463-1474.    |
| 22 F8A1/HAP40   | 1 NP_036283.2     | coagulation factor VIII-associated (intronic transcript) | 12.3    | 27     | Peters et al., 2001., J Biol Chem., 276:3188-3194. |
| 23 PDE1A        | 2 NP_001003683.1  | phosphodiesterase 1A, calmodulin-dependent               | 23.2    | 27     | <a href="http://hdbase.org">http://hdbase.org</a>  |
| 24 GRAP         | 6 NP_006604.1     | GRB2-related adaptor protein                             | 29      | 26     | <a href="http://hdbase.org">http://hdbase.org</a>  |
| 25 EEF1A1       | 22 NP_001393.1    | eukaryotic translation elongation factor 1 alpha 1       | 8.6     | 27     | Mitusi et al., 2002, J Neurosci., 22:9267-77.      |
| 26 NEGR1        | 0 NP_776169.2     | neuronal growth regulator 1                              | 5       | 12     | Kaltenbach et al., 2007, Plos Genet., 3:e82.       |
| 27 GPM6A        | 0 NP_005268.1     | glycoprotein M6A                                         | 1       | 28     | Kaltenbach et al., 2007, Plos Genet., 3:e82.       |
