| <b>Official Symbol</b> | <b>Number</b> | <b>NCBI ID</b> | <b>Official full name</b>                                   | <b>% unstr</b> | <b>Length Reference</b>                                      |
|------------------------|---------------|----------------|-------------------------------------------------------------|----------------|--------------------------------------------------------------|
| 1 TOR1A/DYT1           | 5             | NP_000104.1    | torsin family 1, member A (torsin A)                        | 8.4            | 28 McLean et al., 2002, J Neurochem., 83:846-54.             |
| 2 UBE2L6/UBCH8         | 17            | NP_004214.1    | ubiquitin-conjugating enzyme E2L 6                          | 0              | 0 Lee et al., 2008, Hum Mol Genet. 17:906-17.                |
| 3 CYP2D6               | 0             | NP_000097.2    | cytochrome P450, family 2, subfamily D, polypeptide 6       | 5.4            | 27 Duric et al., 2007, Vojnosanit Pregl. 64:25-30.           |
| 4 GSTA4                | 2             | NP_001503.1    | glutathione S-transferase A4                                | 0              | 0 Patel et al., 2006, Brain Res., 1081:9-18.                 |
| 5 NQO1                 | 2             | NP_000894.1    | NAD(P)H dehydrogenase, quinone 1                            | 9.8            | 27 Zafar et al., 2006, Toxicol Lett., 166:261-7.             |
| 6 HTR6                 | 2             | NP_000862.1    | 5-hydroxytryptamine (serotonin) receptor 6                  | 1.8            | 21 Cao et al., 2007, Neurosci Bull., 23:315-322.             |
| 7 UBE2L3/UBCH7/AMIC    | 37            | NP_003338.1    | ubiquitin-conjugating enzyme E2L 3                          | 5.7            | 17 Shimura et al., 2001, Science., 293:263-9.                |
| 8 IL8                  | 11            | NP_000575.1    | interleukin 8                                               | 0              | 0 Ross et al., 2004, Hum Immunol., 65:340-6.                 |
| 9 FADD                 | 81            | NP_003815.1    | Fas (TNFRSF6)-associated via death domain                   | 13.4           | 28 Hartmann et al., 2002, Neurology., 58:308-10.             |
| 10 CNR1/CB1            | 5             | NP_057167.2    | cannabinoid receptor 1 (brain)                              | 5.2            | 25 González et al., 2006, Brain Res., 1073-1074:209-19.      |
| 11 GAD2                | 2             | NP_000809.1    | glutamate decarboxylase 2 (pancreatic islets and brain, 65k | 4.7            | 18 Luo et al., 2002, Science., 298:425-9.                    |
| 12 SIAH1               | 60            | NP_001006611.1 | seven in absentia homolog 1 (Drosophila)                    | 3.5            | 10 Lee et al., 2008, Hum Mol Genet. 17:906-17.               |
| 13 SLC18A2/VMAT2       | 0             | NP_003045.2    | solute carrier family 18 (vesicular monoamine), member 2    | 7              | 28 Chen et al., 2007, J Neurochem., [Epub ahead of print]    |
| 14 TH/TYH              | 3             | NP_000351.2    | tyrosine hydroxylase                                        | 14.4           | 25 Alerte et al., 2008, Neurosci Lett. [Epub ahead of print] |
| 15 PINK1/PARK6         | 0             | NP_115785.1    | PTEN induced putative kinase 1                              | 0              | 0 Exner et al., 2007, J Neurosci., 27:12413-8.               |
| 16 PARK7               | 7             | NP_009193.2    | Parkinson disease (autosomal recessive, early onset) 7      | 0              | 0 Maita et al., 2007, Neurosci Lett., [Epub ahead of print]  |
