| Official Symbol  | Num NCBI ID       | Official full name                                     | Location      | % unstr | Length | Reference                                                              |
|------------------|-------------------|--------------------------------------------------------|---------------|---------|--------|------------------------------------------------------------------------|
| 1 HADH2/HSD17B1C | 5 NP_001032900.1  | hydroxysteroid (17-beta) dehydrogenase 10              | Xp11.2        | 0       | 0      | Lustbader et al., 2004, Science. 304:448-52.                           |
| 2 GAPDH          | 26 NP_002037.2    | glyceraldehyde-3-phosphate dehydrogenase               | 12p13         | 0       | 0      | Shalova et al., 2007, Biochim Biophys Acta. 1770:826-32.               |
| 3 HMOX1/HSP32    | 3 NP_002124.1     | heme oxygenase (decycling) 1                           | 22q12; 22q13  | 5.48    | 13     | Kakimura et al., 2002, FASEB J. 16:601-3.                              |
| 4 COMT           | 4 NP_000745.1     | catechol-O-methyltransferase                           | 22q11.21-q11  | 1.8     | 5      | Kennedy et al., 2004, J Neural Transm. 111:547-67.                     |
| 5 AHSG/FETUA     | 4 NP_001613.2     | alpha-2-HS-glycoprotein                                | 3q27          | 11.1    | 28     | Geroldi et al., 2005, Neurosci Lett. Oct 7;386(3):176-8.               |
| 6 NDRG2/SYLD     | 0 NP_057334.1     | NDRG family member 2                                   | 14q11.2       | 18      | 27     | Mitchelmore et al., 2004, Neurobiol Dis., 16:48-58.                    |
| 7 APOD           | 6 NP_001638.1     | apolipoprotein D                                       | 3q26.2-qter   | 0       | 0      | Carter et al., 2007, Neurochem Int., 50:12-38.                         |
| 8 ITM2B/FBD      | 1 NP_068839.1     | integral membrane protein 2B                           | 13q14.3       | 14.2    | 16     | Matsuda et al., 2005, J Biol Chem. 280:28912-6.                        |
| 9 KLK10/ PRSSL1  | 0 NP_001070968.1  | kallikrein-related peptidase 10                        | 19q13.3-q13.4 | 7.9     | 13     | Diamandis et al., 2004, Clin Biochem., 7:230-7.                        |
| 10 BAX           | 32 NP_004315.1    | BCL2-associated X protein                              | 19q13.3-q13.4 | 3.1     | 6      | Hauptmann et al., 2008, Neurobiol Aging. Feb 21 [Epub ahead of print]. |
| 11 BCL2L2/BCL-W  | 9 NP_004041.1     | BCL2-like 2                                            | 14q11.2-q12   | 0       | 0      | Yao et al., 2005, J Neurosci. 25:1149-58.                              |
| 12 MSI1          | 0 NP_002433.1     | musashi homolog 1 (Drosophila)                         | 12q24.1-q24.3 | 12.1    | 26     | Lovell et al., 2005, J Neuropathol Exp Neurol., 64:675-80.             |
| 13 PRDX3         | 3 NP_006784.1     | peroxiredoxin 3                                        | 10q25-q26     | 0       | 0      | Kim et al., 2001, J Neural Transm Suppl. 61:223-35.                    |
| 14 ENO1          | 3 NP_001419.1     | enolase 1, (alpha)                                     | 1p36.3-p36.2  | 4.3     | 19     | Butterfield et al., 2006, Neurobiol Dis., 22:223-32.                   |
| 15 CDC2/CDK1     | 82 NP_001777.1    | cell division cycle 2, G1 to S and G2 to M             | 10q21.1       | 5.3     | 6      | Pie et al., 2002, Acta Neuropathol. 104:369-76.                        |
| 16 PARK7         | 7 NP_009193.2     | Parkinson disease (autosomal recessive, early onset) 7 | 1p36.33-p36.4 | 0       | 0      | Choi et al., 2006, J Biol Chem., 281:10816-24.                         |
| 17 BACE2/ASP1    | 0 NP_036237.2     | beta-site APP-cleaving enzyme 2                        | 21q22.3       | 0       | 0      | Stockley et al., 2007, Biochem Soc Trans., 35:574-6.                   |
| 18 PRDX1         | 5 NP_002565.1     | peroxiredoxin 1                                        | 1p34.1        | 14      | 28     | Kim et al., 2001, J Neural Transm Suppl. 61:223-35.                    |
| 19 CTSD          | 7 NP_001900.1     | cathepsin D                                            | 11p15.5       | 0       | 0      | Urbanelli et al., 2008, Neurobiol Aging. 29:12-22                      |
| 20 CDK5          | 29 NP_004926.1    | cyclin-dependent kinase 5                              | 7q36          | 9.2     | 27     | Wen et al., 2008, J Neurosci. 28:2624-32.                              |
| 21 TNF           | 13 NP_000585.2    | tumor necrosis factor (TNF superfamily, member 2)      | 6p21.3        | 5.1     | 12     | Culpan et al., 2007, Neurobiol Aging. Dec 5 [Epub ahead of print].     |
| 22 TTR           | 16 NP_000362.1    | transthyretin (prealbumin, amyloidosis type I)         | 18q12.1       | 17      | 18     | Golabek et al., 1995, Neurosci Lett., 191:79-82.                       |
| 23 HSPB8         | 14 NP_055180.1    | heat shock 22kDa protein 8                             | 12q24.23      | 31.1    | 29     | Wilhelmus et al., 2006, Acta Neuropathol., 111:139-49.                 |
| 24 HSPB6         | 0 NP_653218.1     | heat shock protein, alpha-crystallin-related, B6       | 19q13.12      | 11.8    | 12     | Wilhelmus et al., 2006, Brain Res., 1089:67-78.                        |
| 25 APH1A         | 21 NP_001071096.1 | anterior pharynx defective 1 homolog A (C. elegans)    | 1p36.13-q31.3 | 0       | 0      | Xie et al., 2005, J Mol Neurosci., 25:67-77.                           |
| 26 BGN/DSPG1     | 19 NP_001702.1    | biglycan                                               | Xq28          | 7.06    | 14     | Snow et al., 1995, Arch Biochem Biophys., 320:84-95.                   |

ahead of print]

of print]
