| Official Symbol    | Numl NCBI ID      | Official full name                                            | Location | % unstructur  | Length of Reference | Reference                                                              |
|--------------------|-------------------|---------------------------------------------------------------|----------|---------------|---------------------|------------------------------------------------------------------------|
| 1 NCSTN/APH2       | 20 NP_056146.1    | nicastrin                                                     |          | 1q22-q23      | 11.09               | 50 Xie et al., 2005, J Mol Neurosci., 25:67-77.                        |
| 2 APBB3/SRA        | 6 NP_006042.3     | amyloid beta (A4) precursor protein-binding, family B, memt   | 5q31     |               | 13.78               | 59 Tanahashi et al., 1999, Neurosci Lett., 261:143-6.                  |
| 3 APBA3/mint3      | 2 NP_004877.1     | amyloid beta (A4) precursor protein-binding, family A, memt   | 19p13.3  |               | 13.78               | 93 Tanahashi et al., 1999, Neuroreport., 10:2575-8.                    |
| 4 PSEN1/AD3/FAD    | 85 NP_000012.1    | presenilin 1 (Alzheimer disease 3)                            |          | 14q24.3       | 29.5                | 71 Finckh et al., 2005, Neurogenetics., 6:85-89.                       |
| 5 APPBP2/PAT1      | 23 NP_006371.2    | amyloid beta precursor protein (cytoplasmic tail) binding pro |          | 17q21-q23     | 16.75               | 62 Kuan et al., 2006, J Biol Chem., 281:40114-23.                      |
| 6 TGFB1/CED        | 59 NP_000651.3    | transforming growth factor, beta 1                            |          | 19q13.2; 19q1 | 17.4                | 49 Hashimoto et al., 2005, Mol Cell Biol., 25:9304-17.                 |
| 7 ACHE             | 6 NP_000656.1     | acetylcholinesterase (Yt blood group)                         |          | 7q22          | 18.24               | 50 Silveyra et al., 2008, Mol Cell Biol. Feb 25; [Epub ahead of print] |
| 8 BLMH/ BMH        | 14 NP_000377.1    | bleomycin hydrolase                                           |          | 17q11.2       | 23                  | 36 Lefterov et al., 2001, Biochem Biophys Res Commun. 283:994-9.       |
| 9 FBLN1            | 16 NP_001987.2    | fibulin 1                                                     |          | 22q13.31      | 23.18               | 53 Ohsawa et al., 2001, J Neurochemistry., 76:1411-1420.               |
| 10 NID1            | 22 NP_002499.2    | nidogen 1                                                     |          | 1q43          | 24.53               | 53 Narindrasorasak et al., 1991, J. Biol. Chem., 266:12878-12883.      |
| 11 APPBP1/HPP1     | 6 NP_001018169.1  | amyloid beta precursor protein binding protein 1              |          | 16q22         | 25.84               | 108 Cao et al., 2001, Science., 293:115-20.                            |
| 12 SHC1/p66        | 190 NP_003020.2   | SHC (Src homology 2 domain containing) transforming prote     |          | 1q21          | 26.24               | 55 Xie et al., 2007, J Biol Chem., 282:4318-25.                        |
| 13 IDE             | 5 NP_004960.1     | insulin-degrading enzyme                                      |          | 10q23-q25     | 27.5                | 79 Jean et al., 2007, PLoS ONE., 2:e652.                               |
| 14 GSN             | 26 NP_000168.1    | gelsolin (amyloidosis, Finnish type)                          |          | 9q33          | 29.02               | 51 Ji et al., 2008, Neuroreport. 19:463-6.                             |
| 15 HTATIP/TIP60    | 26 NP_006379.2    | HIV-1 Tat interacting protein, 60kDa                          |          | 11q13         | 32.55               | 55 Cao et al., 2001, Science., 293:115-20.                             |
| 16 NAPB/ SNAP-BETA | 0 NP_071363.1     | N-ethylmaleimide-sensitive factor attachment protein, beta    |          | 20p12.3-p11.1 | 24.8                | 33 Yoo et al., 2001, Dement Geriatr Cogn Disord., 12:219-25.           |
| 17 F12/HAF         | 8 NP_000496.1     | coagulation factor XII (Hageman factor)                       |          | 5q33-qter     | 33.17               | 94 Yasuhara et al., 1994, Brain Res., 654:234-40.                      |
| 18 NUMB/S171       | 29 NP_001005743.1 | numb homolog (Drosophila)                                     |          | 14q24.3       | 34.4                | 51 Roncarati et al., 2002, Proc Natl Acad Sci U S A., 99:7102-7.       |
| 19 COL4A5/ATS/CA54 | 11 NP_000486.1    | collagen, type IV, alpha 5 (Alport syndrome)                  |          | Xq22          | 35.01               | 128 Kiuchi et al., 2002, Life Sci. 70:1555-64.                         |
| 20 COL4A1/arresten | 16 NP_001836.2    | collagen, type IV, alpha 1                                    |          | 13q34         | 35.17               | 132 Kiuchi et al., 2002, Life Sci. 70:1555-64.                         |
| 21 LRP1/APOER      | 93 NP_002323.2    | low density lipoprotein-related protein 1 (alpha-2-macroglobi |          | 12q13-q14     | 35.21               | 155 Liu et al., 2007, Neuron., 56:66-78.                               |
| 22 TGFB2           | 16 NP_003229.1    | transforming growth factor, beta 2                            |          | 1q41          | 38.88               | 77 Harris-White et al., 2004, J Neurosci Res., 77:217-28.              |
| 23 COL4A2          | 16 NP_001837.2    | collagen, type IV, alpha 2                                    |          | 13q34         | 39                  | 183 Kiuchi et al., 2002, Life Sci. 70:1555-64.                         |
| 24 CAV1/VIP21      | 78 NP_001744.2    | caveolin 1, caveolae protein, 22kDa                           |          | 7q31.1        | 40.44               | 72 Gaudreault et al., 2004, Neurobiol Aging., 25:753-9.                |
| 25 ITSN1           | 24 NP_001001132.1 | intersectin 1 (SH3 domain protein)                            |          | 21q22.1-q22.1 | 41.13               | 217 Keating et al., 2006, Ageing Res Rev., 5:388-401.                  |
| 26 KNG1/BDK        | 28 NP_000884.1    | kininogen 1                                                   |          | 3q27          | 42.39               | 154 Puchades et al., 2003, Mol. Brain. Res. 118:140-146                |
| 27 CASP8           | 59 NP_001073593.1 | caspase 8, apoptosis-related cysteine peptidase               |          | 2q33-q34      | 42.79               | 70 Rohn et al., 2001, Neurobiol Dis. 8:1006-16.                        |
| 28 APBB1/FE65      | 24 NP_001155.1    | amyloid beta (A4) precursor protein-binding, family B, memt   |          | 11p15         | 47.18               | 238 Cao et al., 2001, Science., 293:115-20.                            |
| 29 COL4A3          | 16 NP_000082.2    | collagen, type IV, alpha 3 (Goodpasture antigen)              |          | 2q36-q37      | 48.26               | 118 Kiuchi et al., 2002, Life Sci. 70:1555-64.                         |
| 30 APBB2/FE65L     | 7 NP_775098.2     | amyloid beta (A4) precursor protein-binding, family B, memt   |          | 4p14-p13      | 49.4                | 201 Cao et al., 2001, Science., 293:115-20.                            |
| 31 DAB1            | 22 NP_066566.3    | disabled homolog 1 (Drosophila)                               |          | 1p32-p31      | 52.43               | 95 Homayouni et al., 1999, J Neurosci., 19:7507-15.                    |
| 32 HMOX2           | 3 NP_002125.3     | heme oxygenase (decycling) 2                                  |          | 16p13.3       | 53.16               | 48 Takahashi et al., 2000, Neuron. 28:461-73.                          |
| 33 APBA2/MINT2     | 12 NP_005494.2    | amyloid beta (A4) precursor protein-binding, family A, memt   |          | 15q11-q12     | 55.94               | 248 Mcloughlin et al., 1999, Eur J Neurosci., 11:1988-94.              |
| 34 KLC1/KNS2       | 10 NP_005543.2    | kinesin light chain 1                                         |          | 14q32.3       | 61.33               | 105 Kamal et al., 2000, Neuron., 28:449-59.                            |
| 35 APBA1/MINT1     | 28 NP_001154.2    | amyloid beta (A4) precursor protein-binding, family A, memt   |          | 9q13-q21.1    | 62.84               | 334 Lee et al., 2003, J Biol Chem. 278:47025-9.                        |
| 36 CALR            | 45 NP_004334.1    | calreticulin                                                  |          | 19p13.3-p13.1 | 65.46               | 135 Erickson et al., 2005, Biochem Biophys Res Commun. 332:50-7.       |
| 37 COL25A1/CLAC    | 2 NP_115907.2     | collagen, type XXV, alpha 1                                   |          | 4q25          | 74                  | 137 Kakuyama et al., 2005, Biochemistry. 44:15602-9.                   |
| 38 SNCA/PARK1      | 42 NP_000336.1    | synuclein, alpha (non A4 component of amyloid precursor)      |          | 4q21          | 31.4                | 44 Broe et al., 2005, Neurotox Res., 7:69-76.                          |
| 39 ABCA1           | 5 NP_005493.2     | ATP-binding cassette, sub-family A (ABC1), member 1           |          | 9q31.1        | 18.5                | 57 Wahle et al., 2008, J Clin Invest. 118:671-82.                      |
| 40 ABCA2           | 0 NP_001597.2     | ATP-binding cassette, sub-family A (ABC1), member 2           |          | 9q34          | 16                  | 47 Chen et al., 2004, FASEB J. 18:1129-31.                             |
| 41 ABL1/p150       | 121 NP_005148.2   | v-abl Abelson murine leukemia viral oncogene homolog 1        |          | 9q34.1        | 41.2                | 108 Magnani et al., 2007, EMBO J. 26:4546-54.                          |
| 42 COX10           | 0 NP_001294.2     | COX10 homolog, cytochrome c oxidase assembly protein          |          | 17p12-p11.2   | 20.9                | 56 Fukui et al., 2007, Proc Natl Acad Sci U S A., 104:14163-8.         |
| 43 ATF2/CREB2      | 48 NP_001871.2    | activating transcription factor 2                             |          | 2q32          | 41.2                | 108 Yamada et al., 1997, Brain Res. 749:329-34.                        |

|    |                      |     |                |                                                                    |               |      |     |                                                                    |
|----|----------------------|-----|----------------|--------------------------------------------------------------------|---------------|------|-----|--------------------------------------------------------------------|
| 44 | EEF2K                | 0   | NP_037434.1    | eukaryotic elongation factor-2 kinase                              | 16p12.1       | 62.4 | 121 | Li et al., 2005, FEBS J., 272:4211-20.                             |
| 45 | UBQLN1               | 41  | NP_038466.2    | ubiquilin 1                                                        | 9q22; 9q21.2- | 18.5 | 49  | Thomas et al., 2006, J Biol Chem., 281:26400-7.                    |
| 46 | ADAM10/MADM          | 2   | NP_0011101.1   | ADAM metallopeptidase domain 10                                    | 15q2; 15q22   | 45.8 | 81  | Asai et al., 2003, Biochem Biophys Res Commun., 301:231-5.         |
| 47 | RTN4R/NGR            | 0   | NP_075380.1    | reticulin 4 receptor                                               | 22q11.21      | 12.8 | 61  | Park et al., 2006, J Neurosci., 26:1386-95.                        |
| 48 | ADRBK1/GRK2          | 30  | NP_001610.1    | adrenergic, beta, receptor kinase 1                                | 11q13.1       | 38.1 | 98  | Takahashi et al., 2006, Neuropathol Exp Neurol., 65:1157-69.       |
| 49 | PIN1                 | 58  | NP_006212.1    | protein (peptidylprolyl cis/trans isomerase) NIMA-interacting      | 19p13         | 68.7 | 100 | Hamdane et al., 2006, Mol Cell Neurosci., 32:155-60.               |
| 50 | SNCB                 | 5   | NP_001001502.1 | synuclein, beta                                                    | 5q35          | 32.8 | 44  | Windisch et al., 2002, J Mol Neurosci., 19:63-9.                   |
| 51 | MAPK1/ERK            | 109 | NP_002736.3    | mitogen-activated protein kinase 1                                 | 22q11.2; 22q1 | 16.5 | 65  | Nizzari et al., 2007, J Biol Chem., 282:13833-44.                  |
| 52 | COL18A1              | 9   | NP_085059.2    | collagen, type XVIII, alpha 1                                      | 21q22.3       | 49.9 | 121 | van Horssen et al., 2002, Brain Pathol., 12:456-62.                |
| 53 | CXCR3                | 13  | NP_001495.1    | chemokine (C-X-C motif) receptor 3                                 | Xq13          | 17.6 | 33  | Xia et al., 2000, J Neuroimmunol., 108:227-35.                     |
| 54 | GRIA1/GLUH1          | 26  | NP_000818.1    | glutamate receptor, ionotropic, AMPA 1                             | 5q33; 5q31.1  | 22.4 | 50  | Szegedi et al., 2005, Brain Res. 1062:120-6.                       |
| 55 | CTCF                 | 2   | NP_006556.1    | CCCTC-binding factor (zinc finger protein)                         | 16q21-q22.3   | 85   | 168 | Wavrant-De Vrièze et al., 1999, Neuroscience Letters., 269: 67-70  |
| 56 | APOC1                | 4   | NP_001636.1    | apolipoprotein C-I                                                 | 19q13.2       | 44.5 | 37  | Carter et al., 2007, Neurochem Int., 50:12-38.                     |
| 57 | FASLG/TNFSF6         | 52  | NP_000630.1    | Fas ligand (TNF superfamily, member 6)                             | 1q23          | 35.5 | 63  | Su et al., 2003, Neurobiol Dis., 12:182-93.                        |
| 58 | GRIN2A/NR2A          | 39  | NP_000824.1    | glutamate receptor, ionotropic, N-methyl D-aspartate 2A            | 16p13.2       | 42.5 | 288 | Sze et al., 2001, J Neurol Sci., 182:151-9.                        |
| 59 | GRIN2B/NR2B          | 38  | NP_000825.1    | glutamate receptor, ionotropic, N-methyl D-aspartate 2B            | 12p12         | 34.6 | 188 | Sze et al., 2001, J Neurol Sci., 182:151-9.                        |
| 60 | GSK3B                | 64  | NP_002084.2    | glycogen synthase kinase 3 beta                                    | 3q13.3        | 17.8 | 30  | Carter et al., 2007, Neurochem Int., 50:12-38.                     |
| 61 | MEOX2                | 9   | NP_005915.2    | mesenchyme homeobox 2                                              | 7p22.1-p21.3  | 71.3 | 119 | Wu et al., 2005, Nat Med., 11(9):959-65.                           |
| 62 | MMP2/CLG4            | 42  | NP_004521.1    | matrix metallopeptidase 2 (gelatinase A, 72kDa gelatinase, 1       | 16q13-q21     | 71.3 | 119 | Roher et al., 1994, Biochem Biophys Res Commun., 205:1755-61.      |
| 63 | STMN2                | 11  | NP_008960.2    | stathmin-like 2                                                    | 8q21.13       | 69.8 | 125 | Okazaki et al., 1995, Neurobiol Aging. 16:883-94.                  |
| 64 | NRG1                 | 14  | NP_004486.2    | neuregulin 1                                                       | 8p12          | 58.9 | 119 | Chaudhury et al., 2003, J Neuropathol Exp Neurol., 62:42-54.       |
| 65 | MRE11A/ATLD          | 37  | NP_005581.2    | MRE11 meiotic recombination 11 homolog A (S. cerevisiae)           | 11q21         | 52.8 | 269 | Jacobsen et al., 2004, Brain Res Mol Brain Res., 128:1-7.          |
| 66 | MAP2K1/MEK1          | 41  | NP_002746.1    | mitogen-activated protein kinase kinase 1                          | 15q22.1-q22.1 | 16.5 | 65  | Zhu et al., 2003, J Neurochem., 86:136-42.                         |
| 67 | KLK7/PRSS6           | 1   | NP_005037.1    | kallikrein-related peptidase 7                                     | 19q13.33      | 17.3 | 44  | Diamandis et al., 2004, Clin Biochem., 37:230-7.                   |
| 68 | E2F1                 | 70  | NP_005216.1    | E2F transcription factor 1                                         | 20q11.2       | 37.9 | 51  | Jordan-Sciutto et al., 2002, J Neuropathol Exp Neurol., 61:358-67. |
| 69 | EIF4E2/IF4e          | 8   | NP_004837.1    | eukaryotic translation initiation factor 4E family member 2        | 2q37.1        | 43.3 | 58  | Li et al., 2005, FEBS J., 272:4211-20.                             |
| 70 | EIF4EBP1/4EBP1       | 8   | NP_004086.1    | eukaryotic translation initiation factor 4E binding protein 1      | 8p12          | 38.9 | 46  | Li et al., 2005, FEBS J., 272:4211-20.                             |
| 71 | HTR2A/5-HT2A         | 6   | NP_000612.1    | 5-hydroxytryptamine (serotonin) receptor 2A                        | 13q14-q21     | 27.3 | 54  | Lai et al., 2005, Psychopharmacology (Berl). 179:673-7.            |
| 72 | NACA/HSD48           | 9   | NP_005585.1    | nascent polypeptide-associated complex alpha subunit               | 12q23-q24.1   | 81.8 | 98  | Kim et al., 2002, J Investig Med., 50:293-301.                     |
| 73 | NCAM1/CD56           | 12  | NP_000606.3    | neural cell adhesion molecule 1                                    | 11q23.1       | 24   | 53  | Strekalova et al., 2006, Neurobiol Aging., 27(1):1-9.              |
| 74 | CBS/HIP4             | 9   | NP_000062.1    | cystathionine-beta-synthase                                        | 21q22.3       | 20.3 | 63  | Pacheco-Quinto et al., 2006, Neurobiol Dis. 22:651-6.              |
| 75 | GRIK4/EAA1           | 1   | NP_055434.2    | glutamate receptor, ionotropic, kainate 4                          | 11q22.3       | 11.2 | 36  | Jacob et al., 2007, J Alzheimers Dis., 11:97-116.                  |
| 76 | PADI2/PAD2           | 0   | NP_031391.1    | peptidyl arginine deiminase, type II                               | 1p36.13       | 13.9 | 50  | Ishigami et al., 2005, J Neurosci Res., 80:120-8.                  |
| 77 | GFAP                 | 24  | NP_002046.1    | glial fibrillary acidic protein                                    | 17q21         | 65.5 | 107 | Ishigami et al., 2005, J Neurosci Res., 80:120-8.                  |
| 78 | SERPINI1/neuroserpin | 2   | NP_005016.1    | serpin peptidase inhibitor, clade I (neuroserpin), member 1        | 3q26.1        | 8.7  | 36  | Kinghorn et al., 2006, J Biol Chem., 281:29268-77.                 |
| 79 | GRIK5/EAA2           | 7   | NP_002079.3    | glutamate receptor, ionotropic, kainate 5                          | 19q13.2       | 17.8 | 50  | Jacob et al., 2007, J Alzheimers Dis., 11:97-116.                  |
| 80 | LRP8/APOER2          | 14  | NP_001018064.1 | low density lipoprotein receptor-related protein 8, apolipoprotein | 1p34          | 31.4 | 95  | Fuentealba et al., 2007, Mol Neurodegener. 2:14.                   |
| 81 | SIRT1                | 6   | NP_036370.2    | sirtuin (silent mating type information regulation 2 homolog)      | 10q21.3       | 52   | 109 | Chen et al., 2005, J Biol Chem. 280:40364-74.                      |
| 82 | CD40/p50             | 55  | NP_001241.1    | CD40 molecule, TNF receptor superfamily member 5                   | 20q12-q13.2   | 36.8 | 61  | Ait-Ghezala et al., 2007, Eur J Neurosci. 25:1685-95.              |
| 83 | NGFR/CD271           | 29  | NP_002498.1    | nerve growth factor receptor (TNFR superfamily, member 1)          | 17q21-q22     | 37.9 | 74  | Rabizadeh et al., 1994, Proc Natl Acad Sci U S A. 91:10703-6.      |
| 84 | VSNL1/HLP3           | 7   | NP_003376.2    | visinin-like 1                                                     | 2p24.3        | 44.5 | 32  | Schnurra et al., 2001, Neurobiol Dis., 8:900-9.                    |
| 85 | CLU/SP-40            | 26  | NP_001822.2    | clusterin                                                          | 8p21-p12      | 49.6 | 95  | Calero et al., 2005, Subcell Biochem., 38:273-98.                  |
| 86 | FRAP1/MTOR/ RAFT1    | 17  | NP_004949.1    | FK506 binding protein 12-rapamycin associated protein 1            | 1p36.2        | 14.8 | 62  | Li et al., 2005, FEBS J., 272:4211-20.                             |
| 87 | KCNC4                | 0   | NP_001034663.1 | potassium voltage-gated channel, Shaw-related subfamily, r         | 1p21          | 34.4 | 85  | Angulo et al., 2004, J Neurochem., 91:547-57                       |
| 88 | FYN/SLK              | 196 | NP_002028.1    | FYN oncogene related to SRC, FGR, YES                              | 6q21          | 36.9 | 56  | Bhaskar et al., 2005, J Biol Chem., 280:35119-25.                  |

|     |                 |                   |                                                                               |                  |      |                                                                       |
|-----|-----------------|-------------------|-------------------------------------------------------------------------------|------------------|------|-----------------------------------------------------------------------|
| 89  | TUBB3           | 0 NP_006077.2     | tubulin, beta 3                                                               | 16q24.3          | 17.1 | 60 Vijayan et al., 2001, FEBS Lett. 509:375-81.                       |
| 90  | SORL1/LR11      | 10 NP_003096.1    | sortilin-related receptor, L(DLR class) A repeats-containing                  | 11q23.2-q24.1    | 27.1 | 182 Offe et al., 2006, J Neurosci. 26:1596-603                        |
| 91  | DHCR24/SELADIN1 | 0 NP_055577.1     | 24-dehydrocholesterol reductase                                               | 1p33-p31.1       | 12.7 | 39 Cecchi et al., 2008, J Cell Mol Med. Jan 11; [Epub ahead of print] |
| 92  | BDNF            | 7 NP_001700.2     | brain-derived neurotrophic factor                                             | 11p13            | 47.7 | 73 Liu et al., 2007, J Huazhong Univ Sci Technolog Med Sci. 27:233-6. |
| 93  | MME             | 5 NP_000893.2     | membrane metallo-endopeptidase                                                | 3q25.1-q25.2     | 27.7 | 60 Mohazeri et al., 2002, J Biol Chem., 277:35460-5.                  |
| 94  | CYP46A1         | 0 NP_006659.1     | cytochrome P450, family 46, subfamily A, polypeptide 1                        | 14q32.1          | 12.8 | 47 Carter et al., 2007, Neurochem Int., 50:12-38.                     |
| 95  | PRDX2           | 0 NP_859428.1     | peroxiredoxin 2                                                               | 19p13.2          | 18.2 | 36 Yao et al., 2007, Mol Cell Neurosci. 35:377-82.                    |
| 96  | TFAM            | 4 NP_003192.1     | transcription factor A, mitochondrial                                         | 10q21            | 75.6 | 186 Hong et al., 2007, Neurochem Res. 32:1483-8.                      |
| 97  | LAMA1           | 12 NP_005550.2    | laminin, alpha 1                                                              | 18p11.31         | 17.7 | 57 Bozzo et al., 2004, Mol Cell Neurosci. 25:1-8.                     |
| 98  | BCHE            | 1 NP_000046.1     | butyrylcholinesterase                                                         | 3q26.1-q26.2     | 26   | 50 Podoly et al., 2008, Neurodegener Dis. 5:232-6.                    |
| 99  | MAPT/TAU        | 21 NP_005901.2    | microtubule-associated protein tau                                            | 17q21.1          | 80   | 171 Ingram et al., 2002, Trends. Mol. Med., 8:555-62.                 |
| 100 | BACE1/ASP2      | 4 NP_036236.1     | beta-site APP-cleaving enzyme 1                                               | 11q23.2-q23.3    | 8.5  | 32 Stockley et al., 2007, Biochem Soc Trans., 35:574-6.               |
| 101 | PSEN2           | 46 NP_000438.2    | presenilin 2 (Alzheimer disease 4)                                            | 1q31-q42         | 32.7 | 66 Finckh et al., 2005, Neurogenetics., 6:85-89.                      |
| 102 | IFNG            | 5 NP_000610.2     | interferon, gamma                                                             | 12q14            | 43.3 | 46 Yamamoto et al., 2007, Am J Pathol. 170:680-92.                    |
| 103 | BAD/BCL2L8      | 52 NP_004313.1    | BCL2-antagonist of cell death                                                 | 11q13.1          | 87.6 | 185 Kitamura et al., 1998, Brain Res. 780:260-9.                      |
| 104 | IL1B            | 5 NP_000567.1     | interleukin 1, beta                                                           | 2q14             | 38.2 | 36 Tachida et al., 2008, J Neurochem. 104:1387-93.                    |
| 105 | BPTF            | 3 NP_004450.3     | bromodomain PHD finger transcription factor                                   | 17q24.3          | 67.4 | 367 Jordan-Sciutto et al., 2001, Mech Ageing Dev. 123:11-20.          |
| 106 | ACE             | 1 NP_000780.1     | angiotensin I converting enzyme (peptidyl-dipeptidase A) 1                    | 17q23.3          | 20   | 123 Zou et al., 2007, J Neurosci. 27:8628-35.                         |
| 107 | NOS3            | 12 NP_000594.2    | nitric oxide synthase 3 (endothelial cell)                                    | 7q36             | 26.1 | 41 Gentile et al., 2004, J Biol Chem. 279:48135-42.                   |
| 108 | VEGFA           | 31 NP_001020537.2 | vascular endothelial growth factor A                                          | 6p12             | 59.9 | 81 Mateo et al., 2007, Acta Neurol Scand. 116(1):56-8.                |
| 109 | APOE/AD2        | 20 NP_000032.1    | apolipoprotein E                                                              | 19q13.2          | 54.5 | 57 Lambert et al., 2007, Psychoneuroendocrinology., 32:S62-70.        |
| 110 | APP/AD1         | 101 NP_000475.1   | amyloid beta (A4) precursor protein (peptidase nexin-II, Alzheimer disease 1) | 21q21.2; 21q22.3 | 55   | 112 Taylor et al., 2002, Science. 296, 1991-1995.                     |
| 111 | IDE             | 5 NP_004960.2     | insulin-degrading enzyme                                                      | 10q23-q25        | 26.5 | 79 Venugopal et al., 2007, Neurochem Res. 32:2225-34.                 |
| 112 | HSPB2           | 5 NP_001532.1     | heat shock 27kDa protein 2                                                    | 11q22-q23        | 19.7 | 36 Wilhelmus et al., 2006, Brain Res., 1089:67-78.                    |
| 113 | CRYAB           | 11 NP_001876.1    | crystallin, alpha B                                                           | 11q22.3-q23.3    | 29.1 | 33 Smith et al., 2005, Int J Hyperthermia. 21:421-31.                 |
| 114 | GRB2            | 410 NP_002077.1   | growth factor receptor-bound protein 2                                        | 17q24-q25        | 64   | 73 Nizzari et al., 2007, J Biol Chem. 282:13833-44.                   |
