| Protein             | Length | Fold-Index | Total | Maximum |
|---------------------|--------|------------|-------|---------|
| 1 Q6IAI2_HUMAN.seq  | 246    | -0.1540303 | 177   | 87      |
| 2 Q6P5Z4_HUMAN.seq  | 870    | 0.0643328  | 255   | 110     |
| 3 ERGI3_HUMAN.seq   | 383    | 0.1343844  | 108   | 102     |
| 4 Q8IU77_HUMAN.seq  | 35     | -0.0676297 | 35    | 35      |
| 5 Q5XLT4_HUMAN.seq  | 1841   | -0.038691  | 1291  | 274     |
| 6 Q6TV06_HUMAN.seq  | 802    | -0.0051102 | 459   | 109     |
| 7 Q05GC8_HUMAN.seq  | 1220   | 0.0027162  | 627   | 189     |
| 8 Q8IU64_HUMAN.seq  | 22     | -0.0833448 | 22    | 22      |
| 9 Q8IU82_HUMAN.seq  | 38     | 0.1212589  | 0     | 0       |
| 10 BRCA2_HUMAN.seq  | 3418   | 0.0331937  | 1649  | 108     |
| 11 Q96CD4_HUMAN.seq | 466    | 0.101435   | 102   | 102     |
| 12 B4DGB5_HUMAN.seq | 868    | 0.0635214  | 250   | 110     |
| 13 Q3YB50_HUMAN.seq | 35     | 0.0098437  | 0     | 0       |
| 14 A4D1X9_HUMAN.seq | 695    | -0.0326751 | 440   | 128     |
| 15 ABCG2_HUMAN.seq  | 655    | 0.2848948  | 66    | 21      |
| 16 NFIP1_HUMAN.seq  | 221    | 0.2179977  | 74    | 74      |
| 17 LHR2A_HUMAN.seq  | 786    | 0.1825668  | 70    | 17      |
| 18 Q5TBJ7_HUMAN.seq | 3418   | 0.0333839  | 1647  | 108     |
| 19 B3KWD7_HUMAN.seq | 888    | 0.0672029  | 246   | 100     |
| 20 PKHA8_HUMAN.seq  | 519    | 0.105636   | 114   | 80      |
| 21 SEPT1_HUMAN.seq  | 367    | 0.0466532  | 151   | 60      |
| 22 GREB1_HUMAN.seq  | 1949   | 0.1554397  | 429   | 130     |
| 23 RHBT2_HUMAN.seq  | 727    | 0.1333037  | 144   | 88      |
| 24 Q64FK1_HUMAN.seq | 15     | -0.0080173 | 15    | 15      |
| 25 K0100_HUMAN.seq  | 2235   | 0.1546555  | 572   | 62      |
| 26 CQ071_HUMAN.seq  | 991    | 0.0935627  | 362   | 107     |
| 27 PP14C_HUMAN.seq  | 165    | -0.0114089 | 127   | 127     |
| 28 PRP31_HUMAN.seq  | 499    | 0.0745913  | 200   | 82      |
| 29 PBOV1_HUMAN.seq  | 135    | 0.136925   | 29    | 18      |
| 30 Q8IZK4_HUMAN.seq | 15     | -0.8455782 | 15    | 15      |
| 31 Q5TEW3_HUMAN.seq | 734    | 0.0877027  | 230   | 64      |
| 32 ANR17_HUMAN.seq  | 2603   | 0.106311   | 761   | 115     |
| 33 Q9H283_HUMAN.seq | 43     | -0.1921979 | 43    | 43      |
| 34 BCAR3_HUMAN.seq  | 825    | 0.0661295  | 330   | 116     |
| 35 B4DEV4_HUMAN.seq | 916    | 0.0681863  | 272   | 110     |
| 36 B4DIW5_HUMAN.seq | 888    | 0.0575741  | 262   | 110     |
| 37 NRG1_HUMAN.seq   | 640    | -0.0184784 | 377   | 119     |
| 38 B3KW85_HUMAN.seq | 841    | 0.0653485  | 250   | 110     |
| 39 Q9NQR3_HUMAN.seq | 28     | -0.4333386 | 28    | 28      |
| 40 K1967_HUMAN.seq  | 923    | 0.0404789  | 369   | 122     |
| 41 AN30B_HUMAN.seq  | 1477   | -0.0376387 | 1106  | 168     |
| 42 Q9H287_HUMAN.seq | 132    | -0.4034132 | 132   | 132     |
| 43 Q3LRH8_HUMAN.seq | 1822   | -0.0434929 | 1307  | 274     |
| 44 Q3YB51_HUMAN.seq | 37     | -0.028921  | 37    | 37      |
| 45 B3KWE2_HUMAN.seq | 660    | 0.0756339  | 155   | 110     |
| 46 SFXN4_HUMAN.seq  | 337    | 0.2485168  | 0     | 0       |
| 47 B3KNL6_HUMAN.seq | 605    | 0.0968658  | 198   | 64      |
| 48 Q64FK2_HUMAN.seq | 13     | 0.1177175  | 0     | 0       |
| 49 A4D120_HUMAN.seq | 166    | 0.1499059  | 16    | 8       |
| 50 HEAT6_HUMAN.seq  | 1181   | 0.2180099  | 84    | 68      |
| 51 Q05GC6_HUMAN.seq | 1200   | 0.0001131  | 622   | 189     |
| 52 B3KWS6_HUMAN.seq | 323    | 0.0804871  | 110   | 110     |

|     |                  |      |            |      |     |
|-----|------------------|------|------------|------|-----|
| 53  | A8K5Y2_HUMAN.seq | 695  | -0.0315619 | 432  | 120 |
| 54  | BCAS1_HUMAN.seq  | 584  | -0.0834135 | 441  | 149 |
| 55  | Q9H279_HUMAN.seq | 188  | 0.0973556  | 64   | 53  |
| 56  | BRMS1_HUMAN.seq  | 246  | -0.1540303 | 177  | 87  |
| 57  | NCOA3_HUMAN.seq  | 1424 | 0.0060551  | 831  | 97  |
| 58  | Q64FK3_HUMAN.seq | 91   | -0.1726907 | 91   | 91  |
| 59  | Q3YB52_HUMAN.seq | 33   | 0.1414988  | 0    | 0   |
| 60  | B4DLQ5_HUMAN.seq | 275  | -0.0458013 | 148  | 52  |
| 61  | B2RBL9_HUMAN.seq | 870  | 0.0656374  | 231  | 110 |
| 62  | PSMD6_HUMAN.seq  | 389  | 0.1083484  | 98   | 60  |
| 63  | BRCA1_HUMAN.seq  | 1863 | -0.0389695 | 1307 | 274 |
| 64  | B3KU43_HUMAN.seq | 265  | -0.0190485 | 172  | 52  |
| 65  | STRAD_HUMAN.seq  | 431  | 0.1447216  | 90   | 36  |
| 66  | Q4EW25_HUMAN.seq | 166  | -0.1345516 | 164  | 128 |
| 67  | Q7Z606_HUMAN.seq | 1141 | -0.0761719 | 919  | 143 |
| 68  | Q8WZ76_HUMAN.seq | 103  | 0.2437055  | 0    | 0   |
| 69  | Q9H4L2_HUMAN.seq | 54   | -0.0858337 | 54   | 54  |
| 70  | Q8IZK2_HUMAN.seq | 28   | -0.4731243 | 28   | 28  |
| 71  | SYUG_HUMAN.seq   | 127  | 0.030294   | 34   | 34  |
| 72  | Q3YB53_HUMAN.seq | 39   | -0.1036114 | 39   | 39  |
| 73  | Q6TV07_HUMAN.seq | 1780 | -0.0200546 | 1130 | 255 |
| 74  | AKP13_HUMAN.seq  | 2813 | 0.0017787  | 1476 | 147 |
| 75  | KIF15_HUMAN.seq  | 1388 | -0.031133  | 879  | 291 |
| 76  | Q3YB49_HUMAN.seq | 39   | -0.0250602 | 39   | 39  |
| 77  | BCAR1_HUMAN.seq  | 870  | 0.0652932  | 250  | 110 |
| 78  | AN30A_HUMAN.seq  | 1397 | -0.0300709 | 953  | 246 |
| 79  | CALL4_HUMAN.seq  | 196  | 0.0460442  | 99   | 64  |
| 80  | BRM1L_HUMAN.seq  | 323  | -0.1274714 | 230  | 93  |
| 81  | Q9BX99_HUMAN.seq | 715  | 0.0550041  | 278  | 84  |
| 82  | A1YBP1_HUMAN.seq | 2649 | 0.0179225  | 1324 | 108 |
| 83  | TFF1_HUMAN.seq   | 84   | 0.1855448  | 28   | 28  |
| 84  | Q3LRJ0_HUMAN.seq | 1863 | -0.0385988 | 1307 | 274 |
| 85  | Q6FHG5_HUMAN.seq | 127  | 0.030294   | 34   | 34  |
| 86  | ZNHI6_HUMAN.seq  | 470  | -0.0281145 | 342  | 189 |
| 87  | B4DWK2_HUMAN.seq | 501  | 0.1047691  | 125  | 56  |
| 88  | Q9H4L3_HUMAN.seq | 56   | 0.1917977  | 0    | 0   |
| 89  | Q9H281_HUMAN.seq | 352  | 0.0729461  | 118  | 64  |
| 90  | SVEP1_HUMAN.seq  | 3574 | 0.1136757  | 665  | 58  |
| 91  | Q7KYU6_HUMAN.seq | 233  | 0.1413277  | 44   | 44  |
| 92  | MAGD2_HUMAN.seq  | 606  | 0.0512514  | 220  | 164 |
| 93  | NCOA6_HUMAN.seq  | 2063 | 0.0140916  | 1091 | 164 |
| 94  | Q6QEF7_HUMAN.seq | 888  | 0.0751234  | 236  | 101 |
| 95  | SGOL1_HUMAN.seq  | 561  | -0.0844558 | 416  | 261 |
| 96  | BLID_HUMAN.seq   | 108  | 0.2351899  | 5    | 5   |
| 97  | Q9H273_HUMAN.seq | 205  | 0.0040767  | 95   | 51  |
| 98  | Q9H282_HUMAN.seq | 40   | 0.0971303  | 0    | 0   |
| 99  | BIN2_HUMAN.seq   | 565  | -0.0620719 | 456  | 119 |
| 100 | BCA3_HUMAN.seq   | 210  | 0.0470495  | 104  | 55  |
| 101 | Q13559_HUMAN.seq | 34   | 0.2897296  | 0    | 0   |
| 102 | Q8IZK3_HUMAN.seq | 28   | -0.4447339 | 28   | 28  |
| 103 | CF204_HUMAN.seq  | 805  | -0.0398486 | 605  | 306 |
| 104 | ARI4B_HUMAN.seq  | 1312 | -0.1440695 | 1040 | 541 |
| 105 | B3KP06_HUMAN.seq | 825  | 0.0699673  | 330  | 116 |

|     |                  |      |             |      |     |
|-----|------------------|------|-------------|------|-----|
| 106 | O95958_HUMAN.seq | 331  | 0.0533869   | 124  | 63  |
| 107 | A1A518_HUMAN.seq | 179  | 0.304999    | 0    | 0   |
| 108 | A4D1X8_HUMAN.seq | 653  | -0.0274279  | 408  | 128 |
| 109 | Q8IU58_HUMAN.seq | 21   | -0.2018851  | 21   | 21  |
| 110 | Q3LRJ6_HUMAN.seq | 1863 | -0.0389695  | 1307 | 274 |
| 111 | LATH_HUMAN.seq   | 179  | 0.304999    | 0    | 0   |
| 112 | CF125_HUMAN.seq  | 126  | -0.0826806  | 126  | 126 |
| 113 | Q8IZT7_HUMAN.seq | 28   | -0.4465972  | 28   | 28  |
| 114 | TREF1_HUMAN.seq  | 1200 | 0.0001131   | 622  | 189 |
| 115 | AGR3_HUMAN.seq   | 166  | 0.1499059   | 16   | 8   |
| 116 | B4DES0_HUMAN.seq | 712  | -0.0180311  | 405  | 285 |
| 117 | FA84B_HUMAN.seq  | 310  | -0.02440368 | 216  | 94  |
